# Supplementary material
Source: PubMed Central journal article supplement (PMC5460708)

## Supplemental Material

**Supplemental Table 1.** Definitions of outcomes

---

|                          |                                                                                                                                                                                                                                                                                                                                                                 |
|--------------------------|-----------------------------------------------------------------------------------------------------------------------------------------------------------------------------------------------------------------------------------------------------------------------------------------------------------------------------------------------------------------|
| Myocardial infarction    | At least two of the following criteria: 1. chest pain for at least 20 minutes, not disappearing after administration of nitrates; 2. ST-elevation > 1mm in two following leads or a left bundle branch block of the electrocardiogram; 3. Creatine kinase (CK) elevation of at least two times the normal value of CK and a myocardial fraction >5% of total CK |
| Stroke                   | Definite: relevant clinical features causing an increase in impairment of at least one grade on the modified Rankin scale, accompanied by an infarction of hemorrhage on a repeat CT-scan<br>Probable: clinical deficits causing an increase in impairment of at least one grade in the modified Rankin scale, without CT documentation                         |
| Cardiovascular mortality | Death from myocardial infarction, stroke, congestive heart failure, or rupture of abdominal aortic aneurysm.<br>Sudden death (unexpected cardiac death occurring within 1 hour after onset of symptoms, or within 24 hours given convincing circumstantial evidence)                                                                                            |
| Cardiovascular event     | Composite of myocardial infarction, stroke, retinal infarction, and cardiovascular mortality                                                                                                                                                                                                                                                                    |
| All-cause mortality      | Death from any cause                                                                                                                                                                                                                                                                                                                                            |
| End-stage renal disease  | Need for long-term dialysis or renal replacement therapy                                                                                                                                                                                                                                                                                                        |

---

**Supplemental Table 2.** Patient characteristics correlated with mean kidney length in patients with cardiovascular disease and vascular risk factors (n=10,251). Each patient characteristic was analyzed separately.

|                                              |      | Model 1                             |
|----------------------------------------------|------|-------------------------------------|
|                                              | SD   | Mean kidney length in mm<br>(95%CI) |
| Male sex                                     |      | 6.50 (6.15 - 6.85) <sup>1</sup>     |
| Age (years) per SD                           | 12   | -1.97 (-2.13 - -1.80) <sup>2</sup>  |
| Cerebrovascular disease                      |      | -0.70 (-1.11 - -0.29)               |
| Coronary heart disease                       |      | -0.01 (-0.36 - 0.35)                |
| Abdominal aortic aneurysm                    |      | -0.06 (-0.55 - 0.43)                |
| Peripheral arterial disease                  |      | 0.38 (-0.34 - 1.10)                 |
| Diabetes mellitus                            |      | 3.00 (2.59 - 3.42)                  |
| Smoking current or past                      |      | 1.06 (0.68 - 1.43)                  |
| Body height (cm) per SD                      | 9    | 3.12 (2.90 - 3.34)                  |
| Waist circumference (cm) per SD              | 13   | 2.91 (2.73 - 3.08)                  |
| Body mass index (kg/m <sup>2</sup> ) per SD  | 4    | 2.42 (2.27 - 2.58)                  |
| Body surface area (m <sup>2</sup> ) per SD   | 0.2  | 4.54 (4.36 - 4.72)                  |
| Systolic blood pressure (mmHg) per SD        | 22   | 0.50 (0.33 - 0.67)                  |
| Diastolic blood pressure (mmHg) per SD       | 12   | 0.57 (0.40 - 0.73)                  |
| Intima media thickness (mm) per SD           | 0.27 | 0.34 (0.16 - 0.53)                  |
| Total cholesterol (mg/dL) per SD             | 54   | 0.01 (-0.16 - 0.17)                 |
| Log(triglycerides) (mg/dL) per SD            | 0.6  | 0.78 (0.61 - 0.94)                  |
| LDL-cholesterol (mg/dL) per SD               | 46   | -0.13 (-0.30 - 0.03)                |
| HDL-cholesterol (mg/dL) per SD               | 15   | -0.87 (-1.05 - -0.70)               |
| eGFR (ml/min per 1.73m <sup>2</sup> ) per SD | 18   | 2.97 (2.77 - 3.16)                  |
| Albuminuria                                  |      | 0.83 (0.38 - 1.29)                  |
| HbA1c (%) per SD                             | 1.1  | 1.41 (1.21 - 1.62)                  |

Model 1: each patient characteristic was adjusted for age and sex.

<sup>1</sup> adjusted for age, <sup>2</sup> adjusted for sex, SD standard deviation

\* For example; a one standard deviation higher eGFR (corresponding to 18 ml/min per 1.73m<sup>2</sup>) is correlated with a 2.97 mm larger kidney length (95%CI; 2.77 - 3.16).

**Supplemental Table 3.** Relation between tertiles of kidney length and cardiovascular events, mortality, and End-Stage Renal Disease, excluding patients with a kidney length difference of >2 cm

|                                 | <b>First tertile</b><br>(n=3414) | <b>Second tertile</b><br>(n=3415) | <b>Third tertile</b><br>(n=2941) |
|---------------------------------|----------------------------------|-----------------------------------|----------------------------------|
| Range (cm)                      | 7.8-10.8                         | 10.9-11.6                         | 11.7-16.1                        |
|                                 | <b>HR (95%CI)</b>                | <b>HR (95%CI)</b>                 | <b>HR (95%CI)</b>                |
| <b>Myocardial infarction</b>    |                                  |                                   |                                  |
| Number of events                | 221                              | 211                               | 229                              |
| Model I                         | 1.13 (0.91 - 1.41)               | reference                         | 1.21 (0.97 - 1.50)               |
| Model II                        | 1.07 (0.85 - 1.34)               | reference                         | 1.26 (1.01 - 1.57)               |
| <b>Stroke</b>                   |                                  |                                   |                                  |
| Number of events                | 139                              | 119                               | 99                               |
| Model I                         | 1.14 (0.85 - 1.53)               | reference                         | 1.03 (0.75 - 1.41)               |
| Model II                        | 1.05 (0.78 - 1.41)               | reference                         | 1.10 (0.80 - 1.50)               |
| <b>Cardiovascular mortality</b> |                                  |                                   |                                  |
| Number of events                | 270                              | 201                               | 201                              |
| Model I                         | 1.31 (1.04 - 1.64)               | reference                         | 1.22 (0.96 - 1.55)               |
| Model II                        | 1.16 (0.92 - 1.46)               | reference                         | 1.32 (1.04 - 1.68)               |
| <b>Cardiovascular events</b>    |                                  |                                   |                                  |
| Number of events                | 453                              | 386                               | 391                              |
| Model I                         | 1.18 (1.00 - 1.38)               | reference                         | 1.18 (1.01 - 1.40)               |
| Model II                        | 1.08 (0.91 - 1.27)               | reference                         | 1.27 (1.07 - 1.50)               |
| <b>All-cause mortality</b>      |                                  |                                   |                                  |
| Number of events                | 531                              | 436                               | 390                              |
| Model I                         | 1.08 (0.92 - 1.26)               | reference                         | 1.06 (0.90 - 1.25)               |
| Model II                        | 1.02 (0.87 - 1.20)               | reference                         | 1.10 (0.93 - 1.29)               |
| <b>End Stage Renal Disease</b>  |                                  |                                   |                                  |
| Number of events                | 16                               | 21                                | 10                               |
| Model I                         | 1.03 (0.47 - 2.23)               | reference                         | 0.26 (0.10 - 0.69)               |
| Model II                        | 0.32 (0.14 - 0.75)               | reference                         | 0.44 (0.16 - 1.20)               |

Model I age, sex, smoking, body height, waist circumference, diabetes, systolic blood pressure and albuminuria adjusted

Model II age, sex, smoking, body height, waist circumference, diabetes, systolic blood pressure, albuminuria and eGFR adjusted

**Supplemental Table 4.** Relation between tertiles of kidney length and cardiovascular events, mortality, and End-Stage Renal Disease, excluding patients with diabetes mellitus

|                                 | <b>First tertile</b><br>(n=3036) | <b>Second tertile</b><br>(n=2927) | <b>Third tertile</b><br>(n=2314) |
|---------------------------------|----------------------------------|-----------------------------------|----------------------------------|
| Range (cm)                      | 7.8-10.8                         | 10.9-11.6                         | 11.7-16.1                        |
|                                 | <b>HR (95%CI)</b>                | <b>HR (95%CI)</b>                 | <b>HR (95%CI)</b>                |
| <b>Myocardial infarction</b>    |                                  |                                   |                                  |
| Number of events                | 197                              | 168                               | 164                              |
| Model I                         | 1.23 (0.97 - 1.57)               | reference                         | 1.24 (0.97 - 1.59)               |
| Model II                        | 1.15 (0.90 - 1.47)               | reference                         | 1.30 (1.02 - 1.67)               |
| <b>Stroke</b>                   |                                  |                                   |                                  |
| Number of events                | 116                              | 93                                | 77                               |
| Model I                         | 1.12 (0.80 - 1.56)               | reference                         | 1.13 (0.80 - 1.59)               |
| Model II                        | 1.05 (0.75 - 1.47)               | reference                         | 1.19 (0.84 - 1.68)               |
| <b>Cardiovascular mortality</b> |                                  |                                   |                                  |
| Number of events                | 231                              | 157                               | 132                              |
| Model I                         | 1.37 (1.06 - 1.77)               | reference                         | 1.18 (0.89 - 1.57)               |
| Model II                        | 1.19 (0.91 - 1.55)               | reference                         | 1.28 (0.96 - 1.71)               |
| <b>Cardiovascular events</b>    |                                  |                                   |                                  |
| Number of events                | 388                              | 306                               | 279                              |
| Model I                         | 1.22 (1.02 - 1.47)               | reference                         | 1.22 (1.01 - 1.47)               |
| Model II                        | 1.12 (0.93 - 1.35)               | reference                         | 1.29 (1.07 - 1.56)               |
| <b>All-cause mortality</b>      |                                  |                                   |                                  |
| Number of events                | 459                              | 345                               | 270                              |
| Model I                         | 1.11 (0.94 - 1.33)               | reference                         | 1.06 (0.88 - 1.29)               |
| Model II                        | 1.06 (0.89 - 1.27)               | reference                         | 1.10 (0.90 - 1.33)               |
| <b>End-Stage Renal Disease</b>  |                                  |                                   |                                  |
| Number of events                | 16                               | 14                                | 3                                |
| Model I                         | 1.79 (0.73 - 4.35)               | reference                         | 0.26 (0.07 - 0.99)               |
| Model II                        | 0.75 (0.29 - 1.95)               | reference                         | 0.80 (0.20 - 3.21)               |

Model I age, sex, smoking, body height, waist circumference, fasting glucose, systolic blood pressure and albuminuria adjusted

Model II age, sex, smoking, body height, waist circumference, fasting glucose, systolic blood pressure, albuminuria and eGFR adjusted

Supplemental material is neither peer-reviewed nor thoroughly edited by CJASN. The authors alone are responsible for the accuracy and presentation of the material.

**Supplemental Figure 1.** Relation between kidney length and cardiovascular events and mortality. Results are presented as adjusted hazard ratios and 95% confidence intervals (dotted lines).

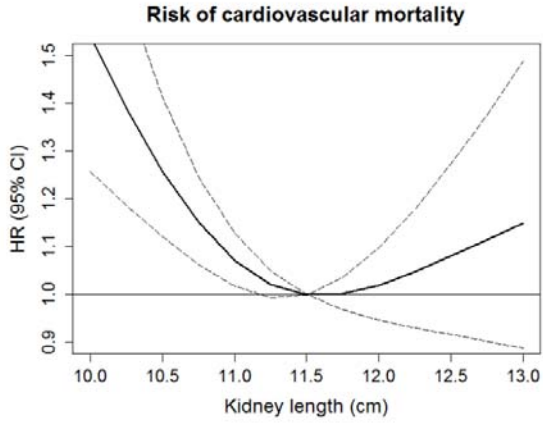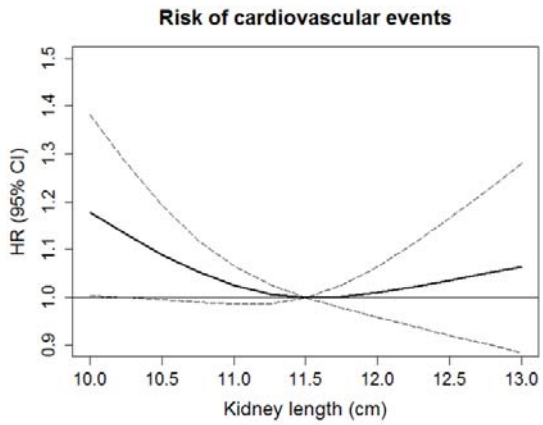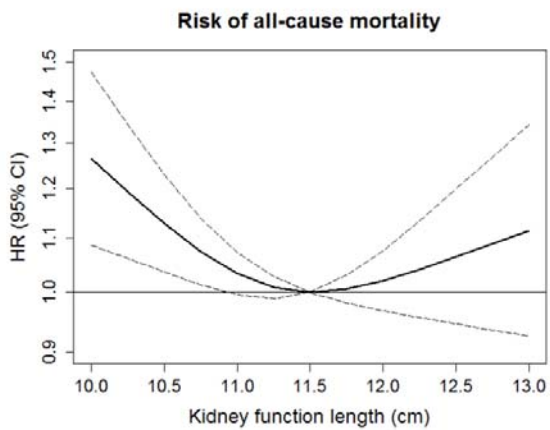

Supplement: CJN.08990816SupplementaryData.pdf [file CJN.08990816SupplementaryData.pdf]
